# Supplementary material for: Development of a novel Brønsted acid UiO-66 metal–organic framework catalyst by postsynthetic modification and its application in catalysis
Source: Royal Society of Chemistry journal article supplement (doi:10.1039/c6ra14365b), 2016-01-01

## **Development of a Novel Brønsted acid UiO-66 Metal-Organic Framework Catalyst by Postsynthetic Modification and its Application in Catalysis**

Zongcheng Miao,<sup>a</sup> Chao Qi,<sup>b</sup> Allison M. Wensley,<sup>b</sup> Yi Luan\*<sup>b</sup>

<sup>a</sup> Xijing University, Xi'an, Shaanxi Province, 710123, P.R. China

<sup>b</sup> School of Materials Science and Engineering, University of Science and Technology Beijing, 30 Xueyuan Road, Haidian District, Beijing 100083, P. R. China

**Supporting Information**

**General Information.** All  $^1\text{H}$  NMR, and  $^{13}\text{C}$  NMR spectra were recorded using Varian Unity Plus 400 (93.94 kG,  $^1\text{H}$  400 MHz) spectrometer at ambient temperature in  $\text{CDCl}_3$ . Chemical shifts are reported in parts per million as follows: chemical shift, multiplicity (s = singlet, d = doublet, t = triplet, q = quartet, m = multiplet, br = broad), coupling constant, and integration. The structure and phase of the samples were evaluated by X-ray powder diffraction (XRD, Rigaku DMAX-RB 12 KW) with  $\text{Cu K}\alpha$  radiation ( $\lambda=0.15406$  nm). The morphology of the as-obtained product was characterized by scanning electron microscopy (SEM, ZEISS SUPRA55). Transmission electron microscopy (TEM) and high-resolution TEM (HRTEM) were conducted on a TEI Tecnai F20. The samples for the SEM, TEM and HRTEM measurements were dispersed in ethanol and sonicated for a few minutes and supported onto the silicon slice and the holey carbon film on a Cu grid, respectively. The specific surface areas were calculated by the Brunauer–Emmett–Teller (BET) method. The pore size distributions were derived from the adsorption branches of isotherms by using the Barrett–Joyner–Halenda (BJH) model. Infrared spectra were recorded on a NICOLET 6700 infrared spectrophotometer. Analytical thin layer chromatography was performed using EMD 0.25 mm silica gel 60-F plates. Flash column chromatography was performed on Sorbent Technologies 60 Å silica gel. All reactions were performed under nitrogen, in oven dried or flame dried glassware with magnetic stirring.

### The synthesis procedure of UiO-66-NH<sub>2</sub> metal-organic framework at nanoscale

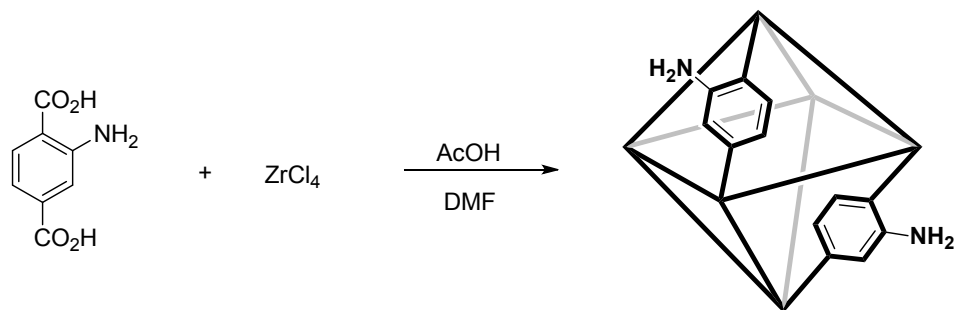

ZrCl<sub>4</sub> (1.6 g, 6.8 mmol) in DMF (150 mL) was stirred with acetic acid (11.4 mL, 3.4 mol) at 55 °C. A DMF solution (50 mL) of 2-aminoterephthalic acid (1.2 g, 6.8 mmol) was added to the previous mixture solution. Then, water (0.5 mL, 0.028 mmol) was added to the solution as well and the solution was sonicated at 60 °C. The mixture solution was further kept in a bath at 120 °C for 24 h. After 24 h, the solution was cooled to room temperature and the precipitate was collected by centrifugation. The obtained solid was washed with DMF (2 x 20 mL), ethanol (3 x 20 mL) and dried under reduced pressure (80 °C, 3 h).

### The synthesis procedure of UiO-66-NH-RSO<sub>3</sub>H catalyst.

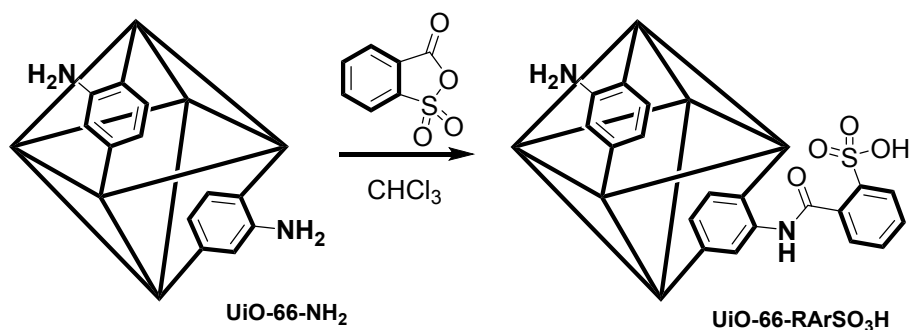

#### *Post-synthetic modification of UiO-66-NH<sub>2</sub>:*

1.77 g of nano-scaled UiO-66-NH<sub>2</sub> (1.0 mmol based on MW of 1766 g/mol) was suspended in 20 mL of CHCl<sub>3</sub>, then 1.0 equiv. of *o*-sulfobenzoic acid anhydride (184 mg, 1.0 mmol) was added. The mixture was stirred slowly at 25 °C for 12 h, after which the solvent was decanted. Fresh DMF (10 mL) was added once a day for three days and then CHCl<sub>3</sub> was used to rinse the crystals once a day for two days. The crystals were dried under vacuum at 40 °C before use.

#### *For catalyst recycling:*

At the end of each reaction cycle, the catalyst was recovered by centrifugation of the solution mixture followed by washing with 5 - 10 mL ethanol (acetalization reaction) or

THF (MBH reaction). After being immersed in the solvent for 12 h and dried at 40 °C under vacuum for 12 h, the catalyst was reused.

### General procedure for acetalization of aldehydes using UiO-66-NH-RArSO<sub>3</sub>H catalyst

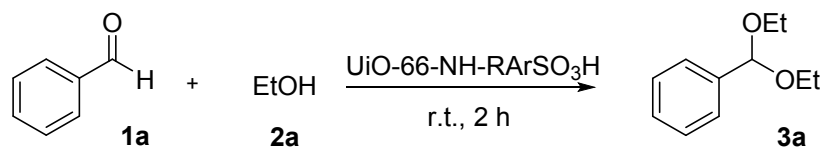

A 10-mL reaction vessel (oven dried) was charged with UiO-66-NH-RArSO<sub>3</sub>H catalyst (based on 20 mol% aromatic sulfonic acid, MW of UiO-66-NH-RArSO<sub>3</sub>H = 1803, 0.001 mmol, 1.80 mg in Table 1) in 0.5 mL dry ethanol and benzaldehyde substrate (106 mg, 1.0 mmol). The reaction mixture was stirred under N<sub>2</sub> atmosphere at room temperature (23 °C) for 2 h. After the reaction was complete, the reaction mixture was centrifuged. The yield of desired acetal product was determined by GC-MS using nitrobenzene as internal standard.

### General procedure for the Morita-Baylis-Hillman reaction using UiO-66-NH-RArSO<sub>3</sub>H catalyst

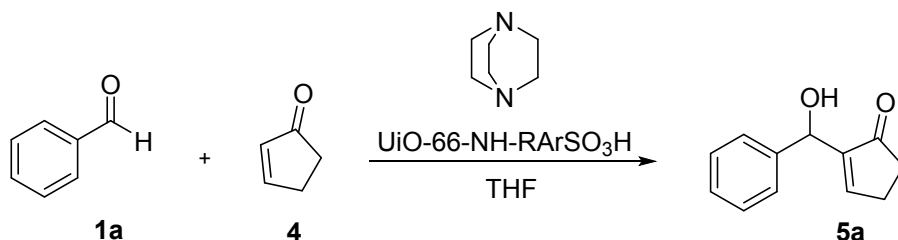

A 10-mL reaction vessel was charged with 0.001 mol% UiO-66-NH-RArSO<sub>3</sub>H catalyst (0.001 mmol, 1.80 mg), benzaldehyde substrate (106 mg, 1.0 mmol), 2-cyclopenten-1-one (164 mg, 2.0 mmol), 1,4-diazabicyclo [2.2.2]octane (56 mg, 0.5 mmol) in 2.0 mL of tetrahydrofuran under N<sub>2</sub> atmosphere. The reaction was stirred at 23 °C for 6 h. After dilution with hexanes, the reaction mixture was directly subjected to flash chromatography on silica gel and eluted with a hexanes:ethyl acetate solution (9:1 - 1:1) to yield 2-(hydroxy(phenyl)methyl)cyclopent-2-enone **5a** as a colorless oil.

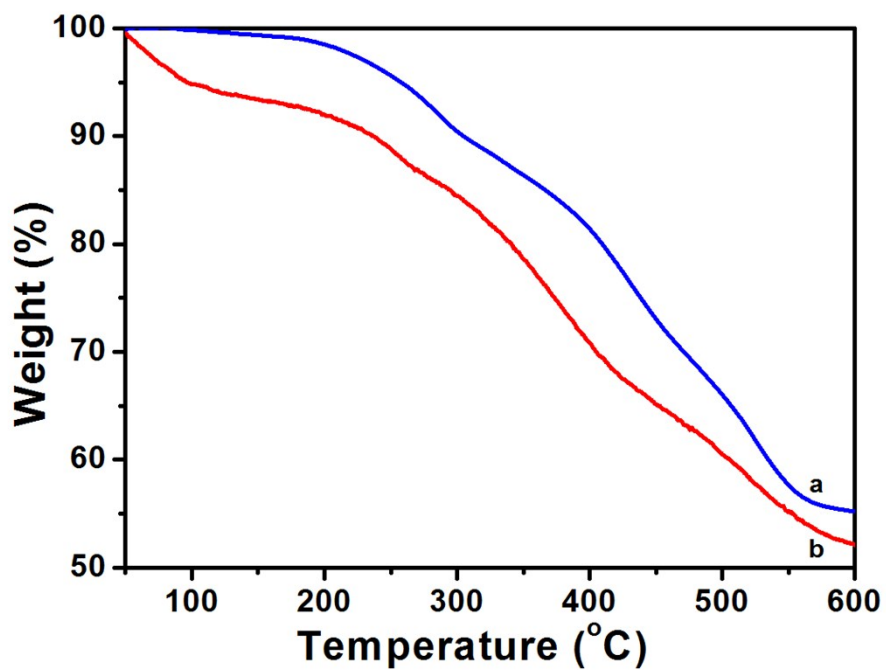

Fig. S1 TGA spectra of (a) UiO-66-NH<sub>2</sub> and (b) UiO-66-RArSO<sub>3</sub>H catalyst.

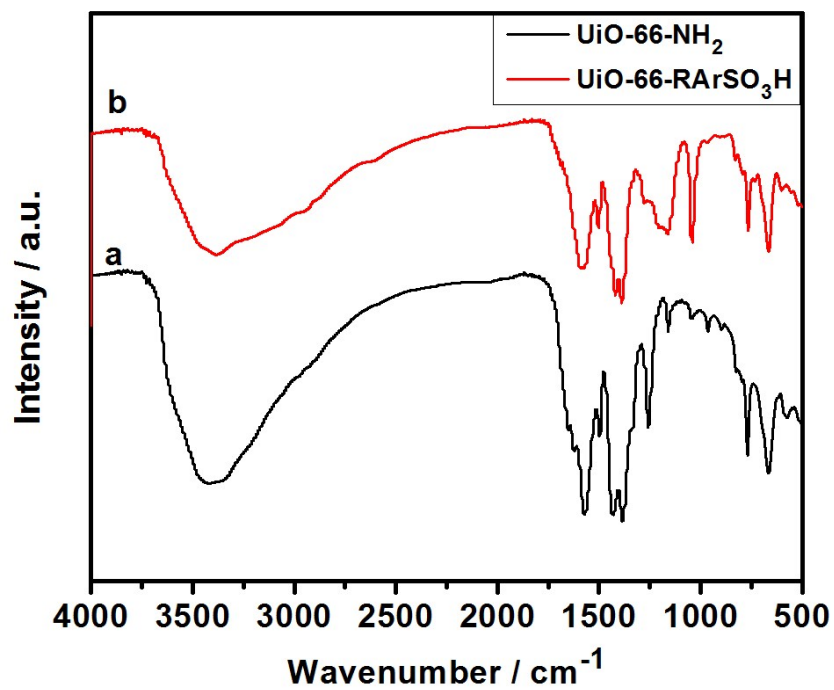

Fig. S2 FTIR spectra of UiO-66-NH<sub>2</sub> (Black, bottom) and UiO-66-RArSO<sub>3</sub>H catalyst (Red, top).

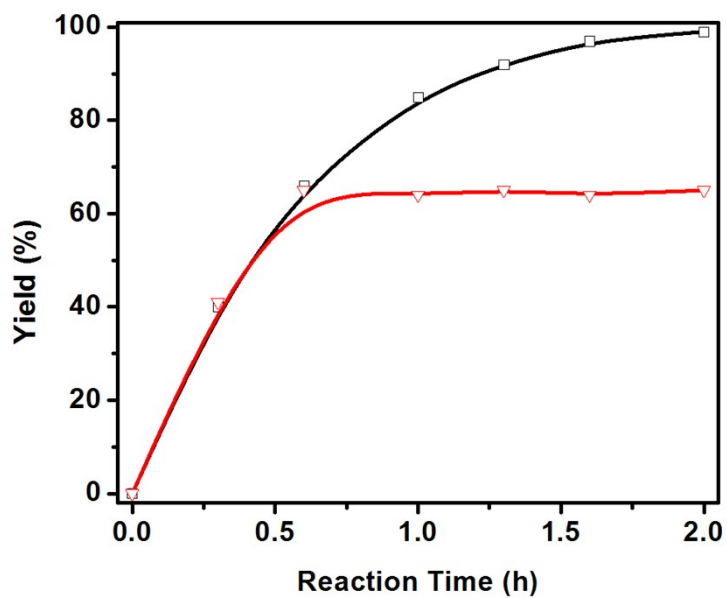

**Fig. S3** Conversion *versus* time in the acetalization of benzaldehyde catalyzed by UiO-66-NH-RSO<sub>3</sub>H (Black). Catalyst was filtered at 40 min (Red).

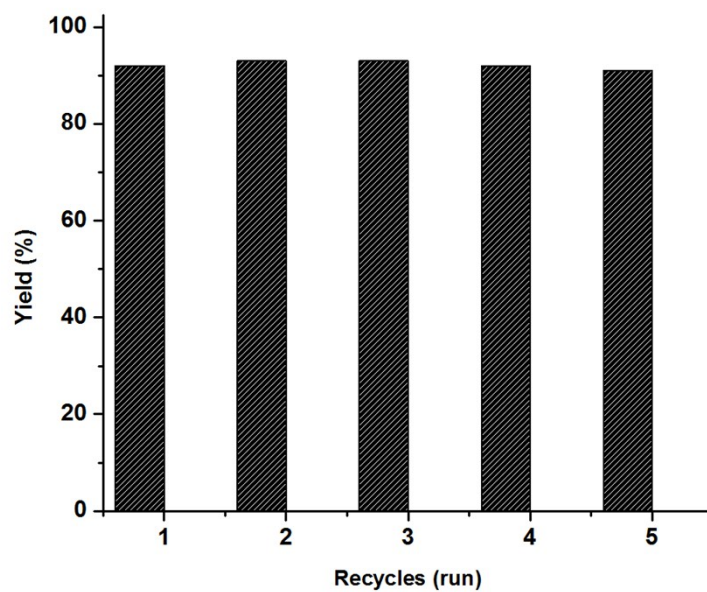

**Fig. S4.** The catalyst recycling of UiO-66-RArSO<sub>3</sub>H in MBH reaction.

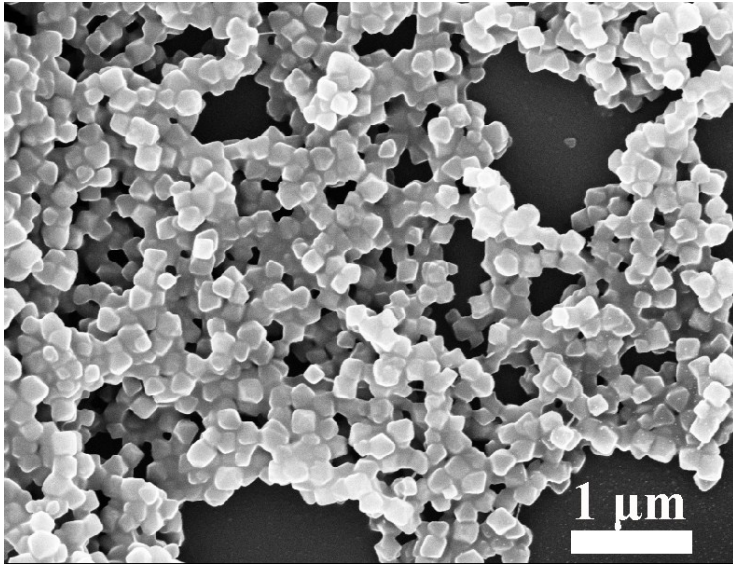

**Fig. S5** SEM image of recycled UiO-66-RArSO<sub>3</sub>H.

Table S1. Control reaction for UiO-66-RSO<sub>3</sub>H catalyzed Morita-Baylis-Hillman reaction.

| Entry | Catalyst                    | Additive        | Yield |
|-------|-----------------------------|-----------------|-------|
| 1     | -                           | -               | 0%    |
| 2     | -                           | DABCO (0.5 eq.) | 23%   |
| 3     | UiO-66-RArSO <sub>3</sub> H | -               | 11%   |
| 4     | UiO-66-RArSO <sub>3</sub> H | DABCO (0.5 eq.) | 92%   |

Reaction conditions: aldehyde (1.0 mmol), 2-cyclopenten-1-one (2.0 mmol), 1,4-diazabicyclo [2.2.2]octane (0.5 mmol), UiO-66-RArSO<sub>3</sub>H catalyst (0.1 mol%), were stirred at 23 °C for 6 h.



Table S2. Literature comparison for MBH reaction of 2-cyclohexene-1-one.

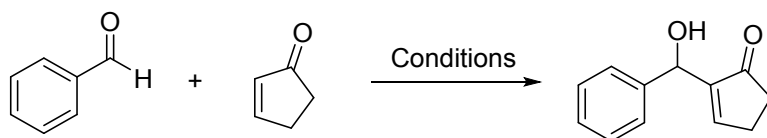

| Catalyst                    | Loading                        | Reaction time | T (°C) | Solvent                                                | Yield | Reference |
|-----------------------------|--------------------------------|---------------|--------|--------------------------------------------------------|-------|-----------|
| Bis(thio)urea               | 20 mol%<br>with 4 eq. of enone | 72 h          | 10     | neat                                                   | 99    | 1         |
| NMP and Ba(OH) <sub>2</sub> | 5 mol% and 1.5 mol%            | 9 h           | 0      | CH <sub>3</sub> OH/<br>CH <sub>2</sub> Cl <sub>2</sub> | 73%   | 2         |
| EtAlI                       | 120 mol%                       | 24 h          | 0      | CH <sub>2</sub> Cl <sub>2</sub>                        | 56%   | 3         |
| TMG/azole                   | 10 mol%/10 mol%                | 24 h          | 23     | THF                                                    | 94%   | 4         |
| UiO-66-RArSO <sub>3</sub> H | 0.1 mol%                       | 6 h           | 23     | THF                                                    | 92%   | This work |

1. Albrecht Berkessel, Katrin Roland, Jörg M. Neudörfl, Asymmetric Morita-Baylis-Hillman Reaction Catalyzed by Isophoronediamine-Derived Bis(thio)urea Organocatalysts, *Org. Lett.*, 2006, 8 (19), 4195-4198.

2. Krassimira P. Guerra, Carlos A.M. Afonso, An efficient and simple Morita-Baylis-Hillman reaction based on the N-methylpyrrolidine Ba(OH)<sub>2</sub> catalytic system, *Tetrahedron*, 2011, 67, 2562-2569.

3. Wei Pei, Han-Xun Wei and Guigen Li, The Baylis-Hillman condensation of a,b-conjugate cycloketones with aldehydes using diethylaluminum iodide alone as the promoter, *Chem. Commun.*, 2002, 2412-2413.

4. Masahiro Terada, Satoko Fukuchi, Kei Amagai, Megumi Nakano, Hitoshi Ube, Guanidine/Azole Binary System as an Efficient Catalyst for Morita-Baylis-Hillman Reaction, *ChemCatChem*, 2012, 4, 963-967.

Fig. S6  $^1\text{H}$  and  $^{13}\text{C}$  NMR spectra of MBH reaction products.

2-(Hydroxy-phenyl-methyl)-cyclopent-2-enone (5a)

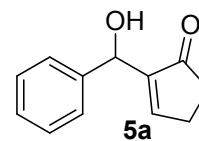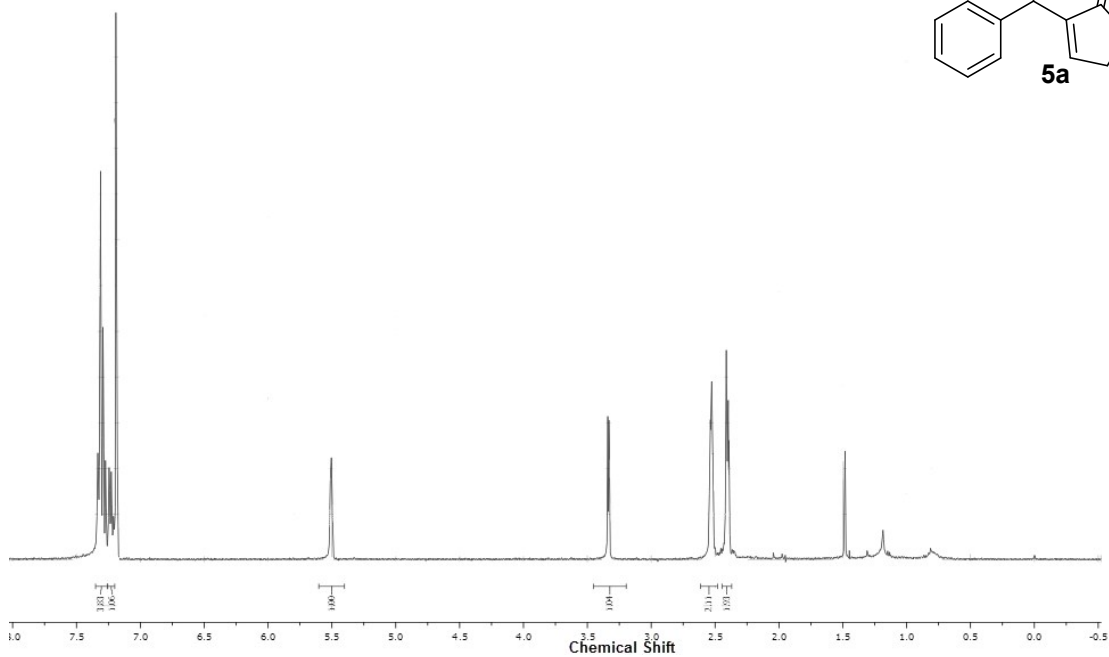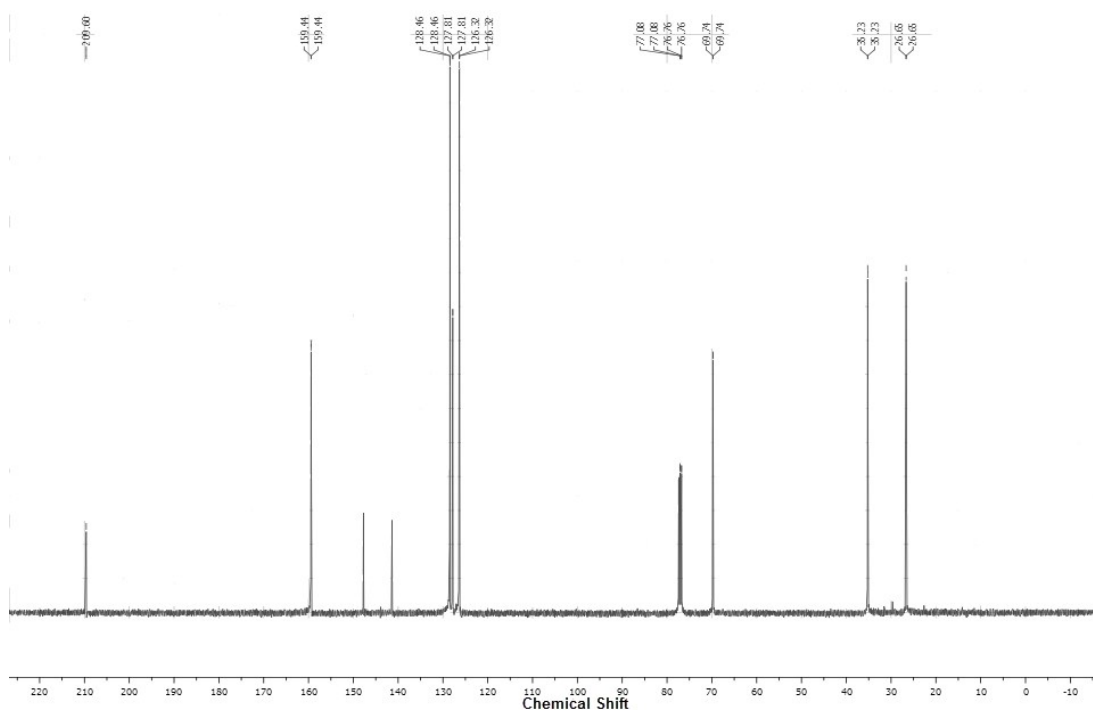

## 2-(Hydroxy-*p*-tolyl-methyl)-cyclopent-2-enone (5b)

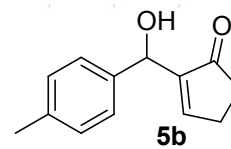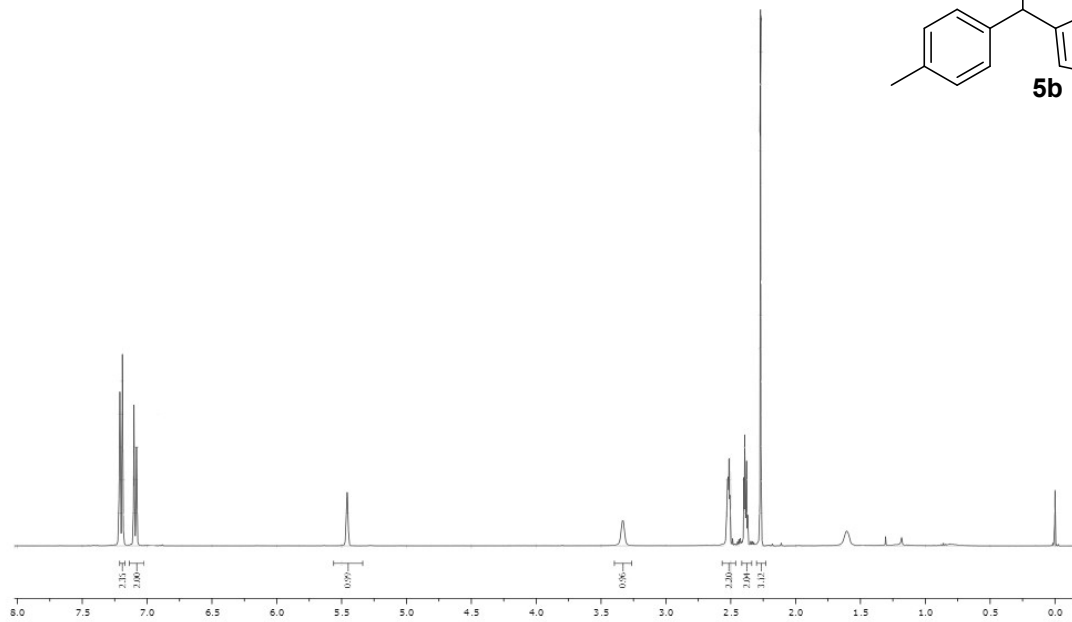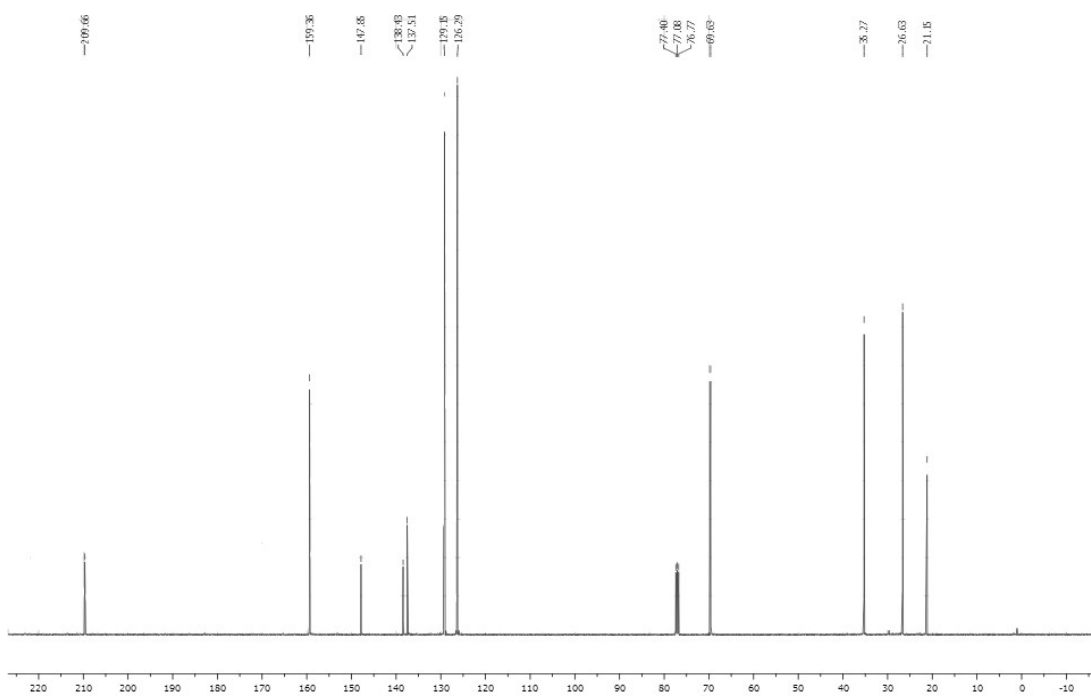

# 2-[(4-Fluoro-phenyl)-hydroxy-methyl]-cyclopent-2-enone (5c)

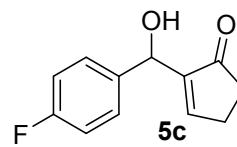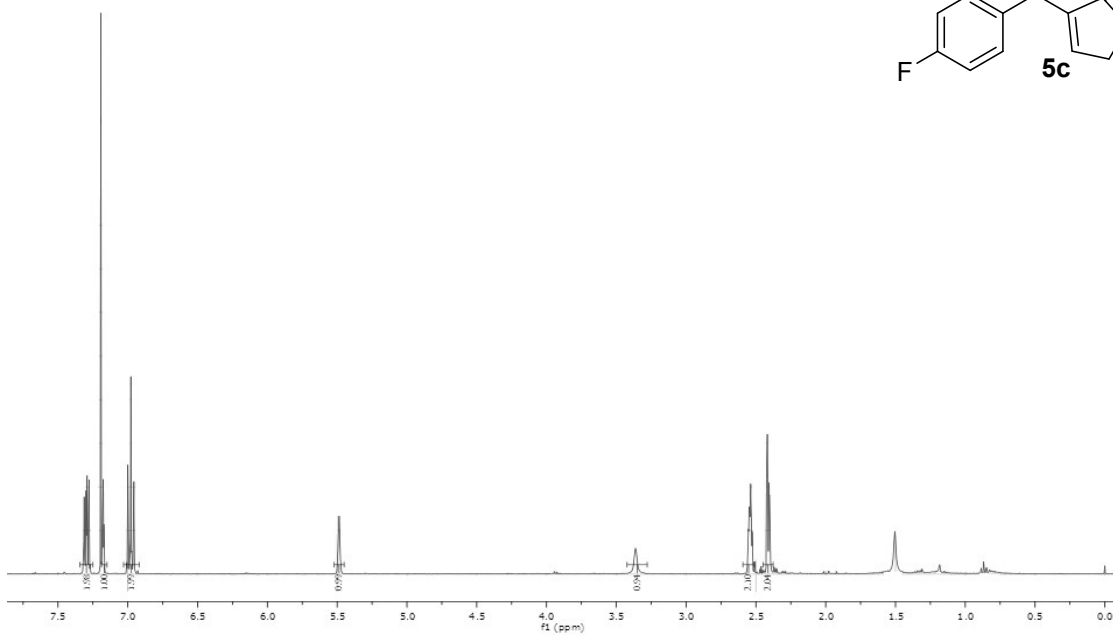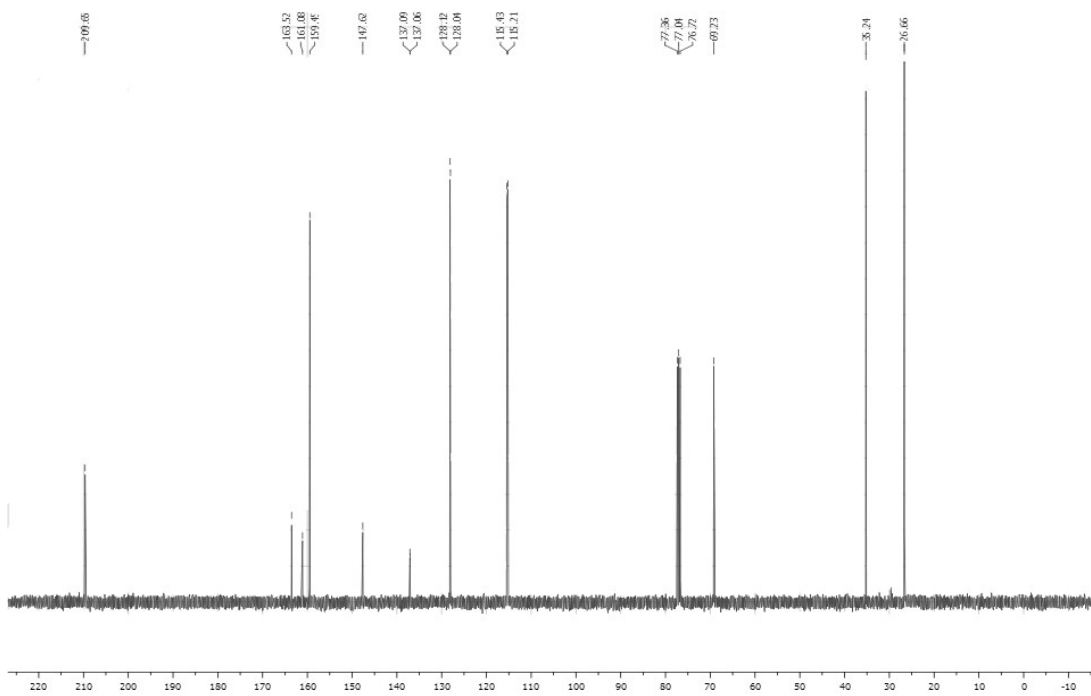

## 2-(Hydroxy-naphthalen-2-yl-methyl)-cyclopent-2-enone (5d)

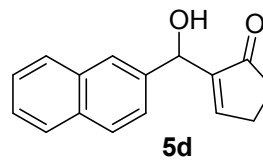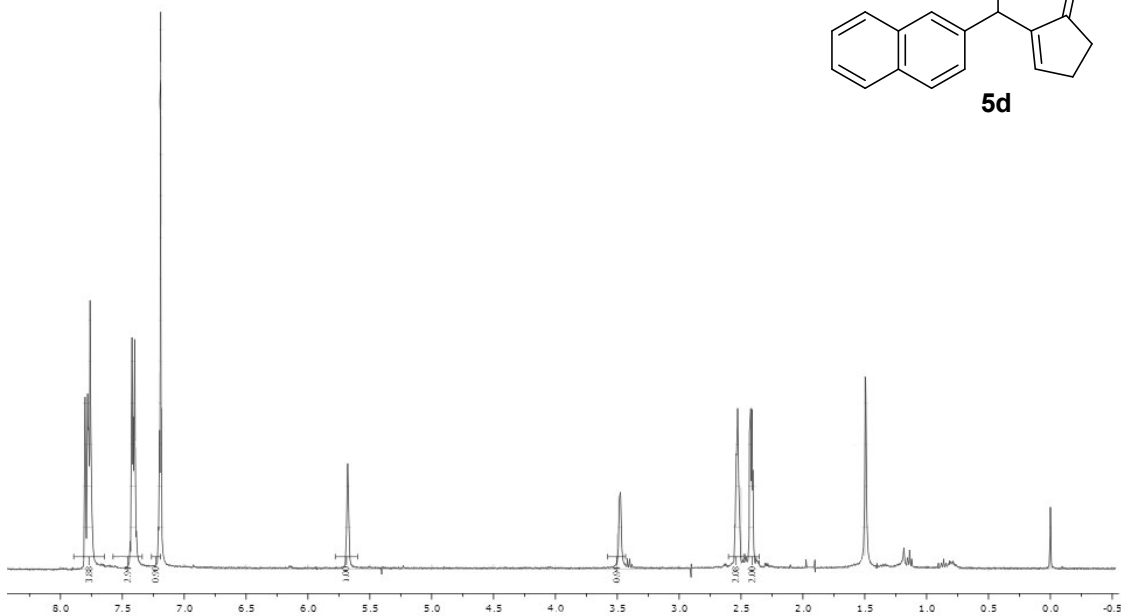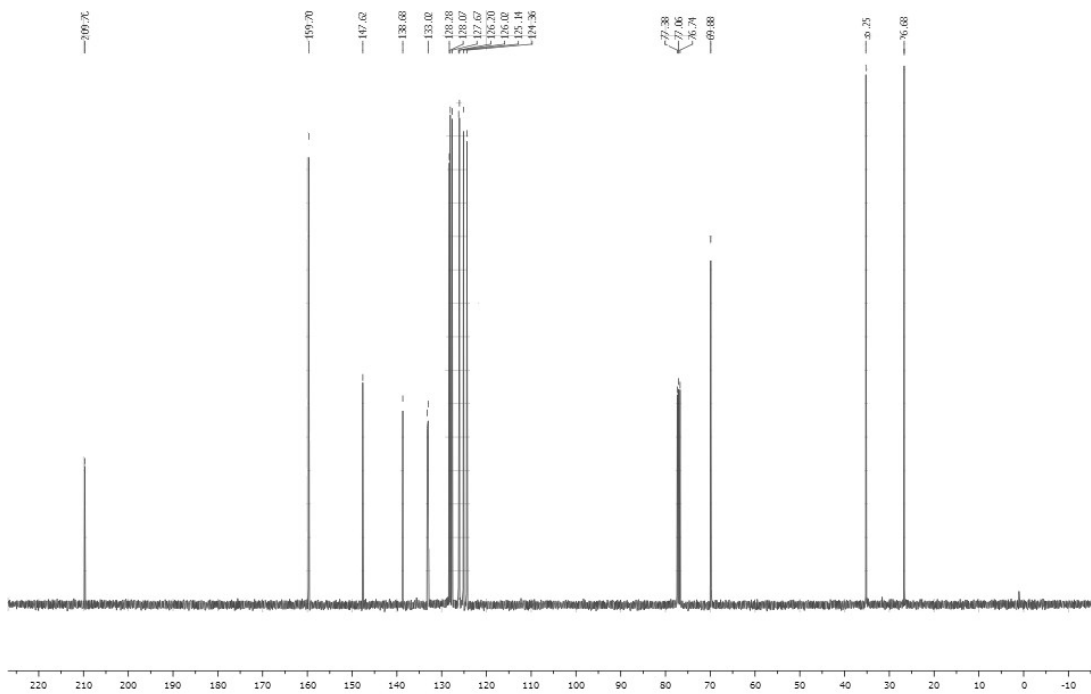

## 2-(1-Hydroxy-3-phenyl-propyl)-cyclopent-2-enone (5f)

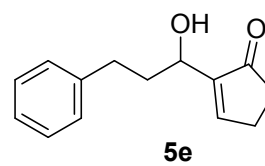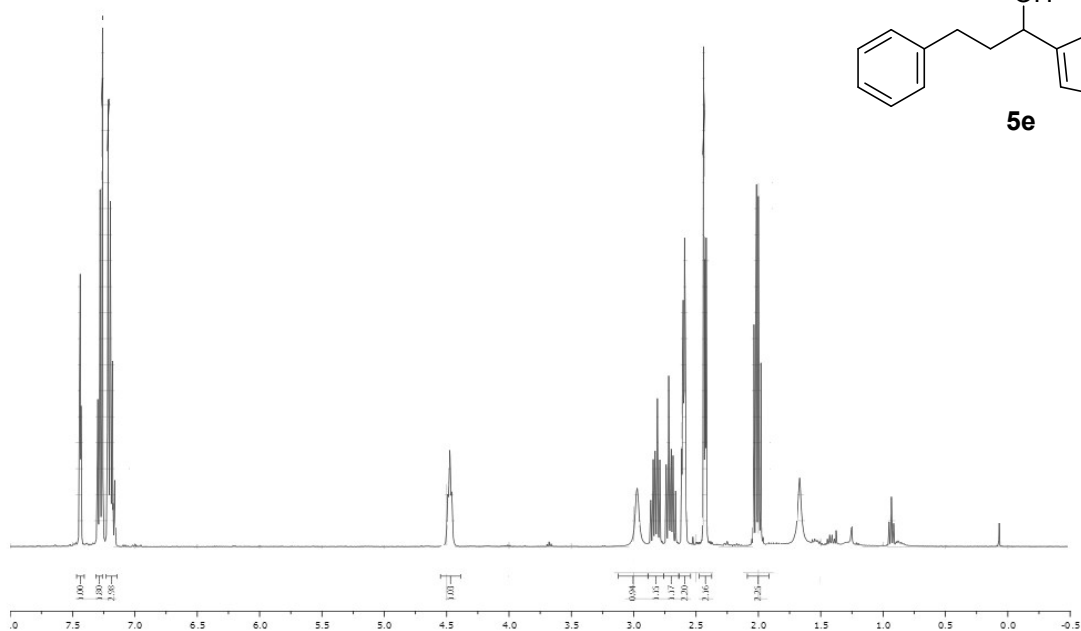

Chemical shift values (ppm): 10.20, 88.10, 67.43, 64.13, 61.00, 28.88, 25.88, 67.18, 37.12, 35.22, 31.66, 26.56

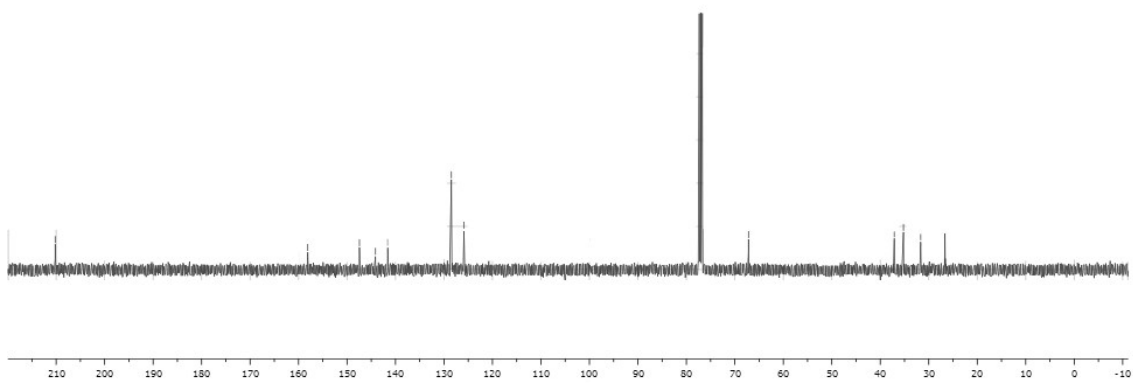

Supplement: c6ra14365b1.pdf [file c6ra14365b1.pdf]
